# Supplementary material for: The feasibility of mixed Ga and In hybrid halide perovskites as alternatives to Pb halide perovskites
Source: Royal Society of Chemistry journal article supplement (doi:10.1039/d3nj04558g), 2023-12-11

## Supplementary Material

### **The feasibility of hybrid halide perovskites using mixed Ga and In as Pb alternatives**

Tanmoy Kalita<sup>a</sup>, Tridip Chutia<sup>a</sup>, Ranjit Tumung<sup>a</sup> and Dhruba Jyoti Kalita<sup>a\*</sup>

a) Department of Chemistry, Gauhati University

Electronic mail: dhrubajyoti.kalita@gauhati.ac.in

**Table S1: Calculated lattice parameters and band gaps ( $E_g$ ) of the reference OIHP material.**

| Compound           | Functionals | Theoretical |       |      |            | Experimental |        |       |            |
|--------------------|-------------|-------------|-------|------|------------|--------------|--------|-------|------------|
|                    |             | a(Å)        | b(Å)  | c(Å) | $E_g$ (eV) | a(Å)         | b(Å)   | c(Å)  | $E_g$ (eV) |
| MASnI <sub>3</sub> | LDA         | 6.55        | 13.66 | 9.44 | 0.82       | 8.556        | 12.428 | 8.326 | 1.3        |
|                    | PBE         | 7.30        | 13.92 | 9.60 | 1.31       |              |        |       |            |
|                    | PBEsol      | 8.50        | 13.15 | 9.14 | 1.26       |              |        |       |            |
|                    | PBE0        | 8.53        | 13.17 | 9.16 | 2.10       |              |        |       |            |
|                    | HSE06       | 8.51        | 13.16 | 9.15 | 1.96       |              |        |       |            |

**Table S2: Band gap values of the reference compound with different k-point mesh for convergence test.**

| Compound                                         | k-point mesh | Band gap (eV) |
|--------------------------------------------------|--------------|---------------|
| CH <sub>3</sub> NH <sub>3</sub> SnI <sub>3</sub> | 2 x 2 x 2    | 1.30          |
|                                                  | 4 x 4 x 4    | 1.31          |

**Relative phase compositions of the designed materials:**

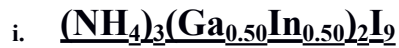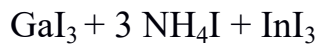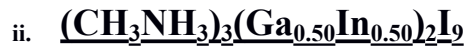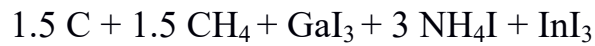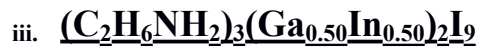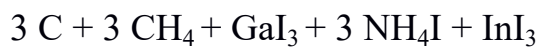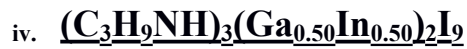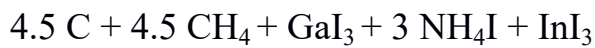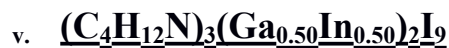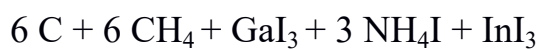

Supplement: d3nj04558g1.pdf [file d3nj04558g1.pdf]
